# Supplementary material for: Achievement of efficient thermally activated delayed fluorescence materials based on 1,8-naphthalimide derivatives exhibiting piezochromic and thermochromic luminescence
Source: Royal Society of Chemistry journal article supplement (doi:10.1039/d4ra02981j), 2024-01-01
Supplement: d4ra02981j1.pdf [file d4ra02981j1.pdf]

# Supporting Information

## CONTENTS

- 1. Structural Characterization Information**
- 2. Supporting Tables**



010907 #77 RT: 1.99 AV: 1 NL: 8.47E4  
T: + c Full ms [45.00-800.00]

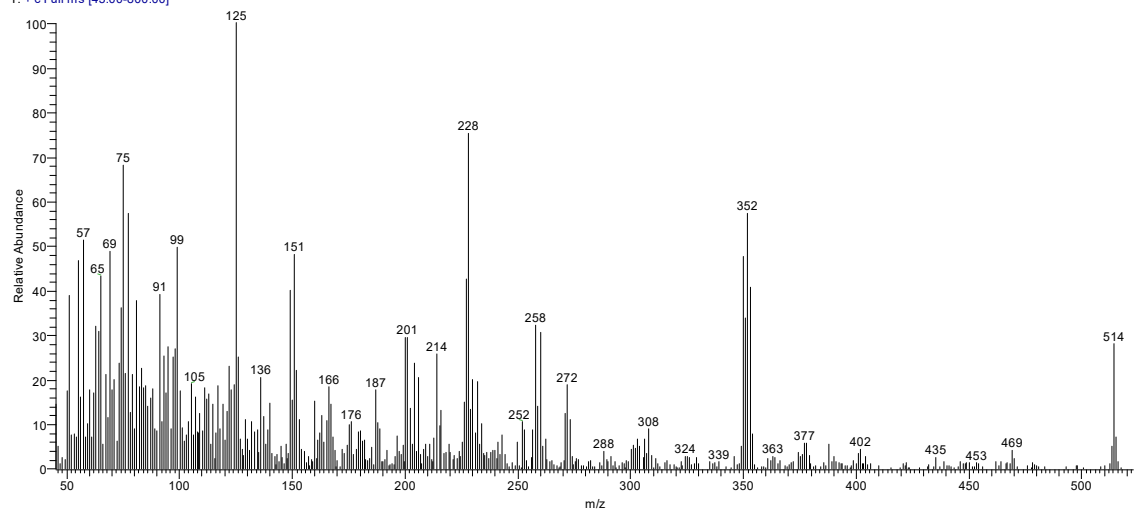

Figure S3 EI-MS spectrum of compound NI-mPCz.

010909-ph-c1 #11 RT: 0.42 AV: 1 NL: 1.13E4  
T: + c EI Full ms [502.50-519.50]

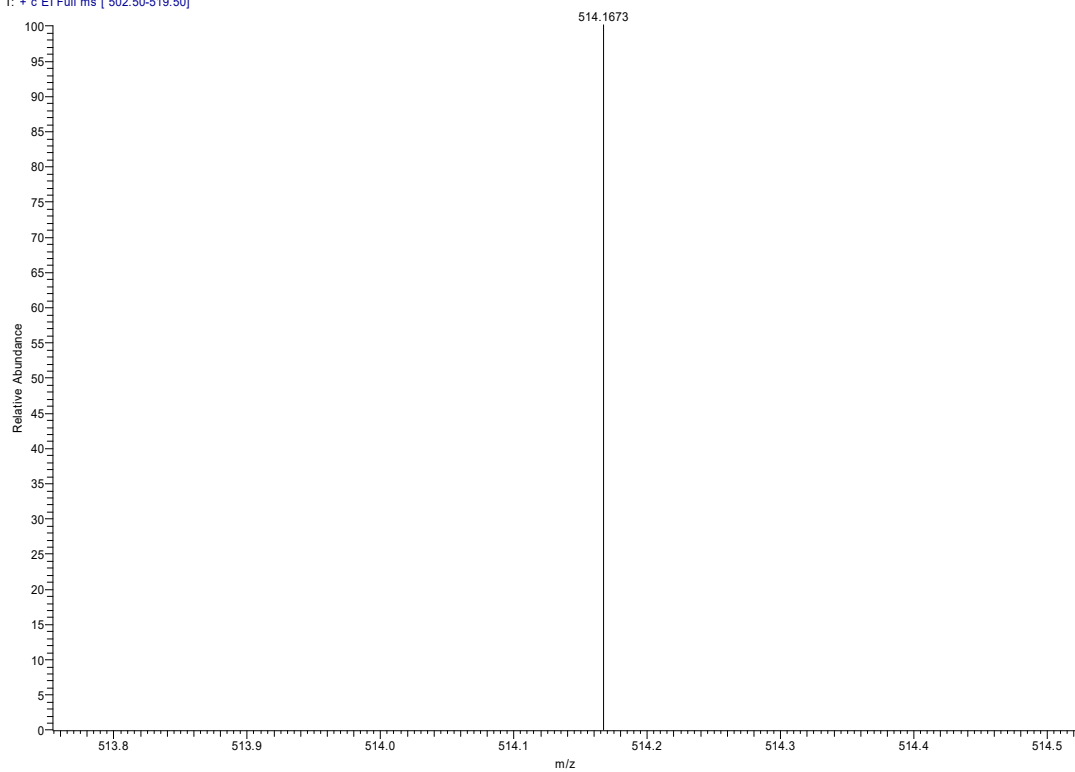

Figure S4 HRMS spectrum of compound NI-mPCz.

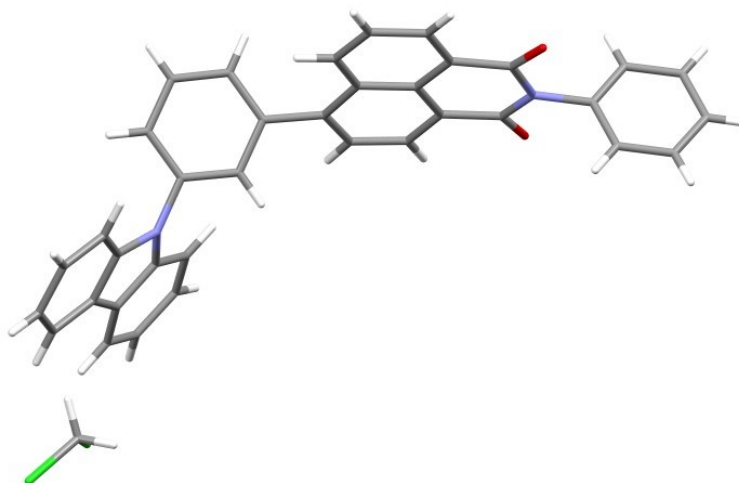

Figure S5 The single-crystal structure of NI-mPCz

## 2. Supporting Tables

Table 1 Crystal data and structure refinement for NI-mPCz.

|                       |                                                                               |
|-----------------------|-------------------------------------------------------------------------------|
| Identification code   | NI-mPCz                                                                       |
| Empirical formula     | C <sub>37</sub> H <sub>24</sub> Cl <sub>2</sub> N <sub>2</sub> O <sub>2</sub> |
| Formula weight        | 599.48                                                                        |
| Temperature/K         | 273(2)                                                                        |
| Crystal system        | monoclinic                                                                    |
| Space group           | P2 <sub>1</sub> /c                                                            |
| a/Å                   | 13.24880(10)                                                                  |
| b/Å                   | 13.19660(10)                                                                  |
| c/Å                   | 16.31220(10)                                                                  |
| α/°                   | 90                                                                            |
| β/°                   | 93.1790(10)                                                                   |
| γ/°                   | 90                                                                            |
| Volume/Å <sup>3</sup> | 2847.62(4)                                                                    |

|                                                |                                                               |
|------------------------------------------------|---------------------------------------------------------------|
| Z                                              | 4                                                             |
| $\rho_{\text{calc}}/\text{cm}^3$               | 1.398                                                         |
| $\mu/\text{mm}^{-1}$                           | 2.356                                                         |
| F(000)                                         | 1240.0                                                        |
| Crystal size/ $\text{mm}^3$                    | ? $\times$ ? $\times$ ?                                       |
| Radiation                                      | CuK $\alpha$ ( $\lambda = 1.54184$ )                          |
| 2 $\Theta$ range for data collection/ $^\circ$ | 8.624 to 148.312                                              |
| Index ranges                                   | $-16 \leq h \leq 16, -16 \leq k \leq 16, -20 \leq l \leq 20$  |
| Reflections collected                          | 20667                                                         |
| Independent reflections                        | 5703 [ $R_{\text{int}} = 0.0208, R_{\text{sigma}} = 0.0155$ ] |
| Data/restraints/parameters                     | 5703/0/161                                                    |
| Goodness-of-fit on $F^2$                       | 1.078                                                         |
| Final R indexes [ $I \geq 2\sigma(I)$ ]        | $R_1 = 0.0708, wR_2 = 0.1805$                                 |
| Final R indexes [all data]                     | $R_1 = 0.0740, wR_2 = 0.1831$                                 |
| Largest diff. peak/hole / $e \text{ \AA}^{-3}$ | 1.07/-0.58                                                    |
